# Supplementary material
Source: publisher site journal article supplement (https://www.spandidos-publications.com/4450/downloadSupplementary)
Supplement: Supplementary file 1 [file downloadSupplementary]

## Sheet: CTD
Table SXVI. A total of 141 potential drugs were identified by Comparative Toxicogenomics Database to modulate the expression of 3 diagnostic biomarkers
ChemicalName	GeneSymbol	Organism	InteractionActions
2,2',4,4'-tetrabromodiphenyl ether	CDC25A	Homo sapiens	increases^expression
5-OH-BDE-47	CDC25A	Homo sapiens	increases^expression
Acetaminophen	CDC25A	Homo sapiens	increases^expression
Aflatoxin B1	CDC25A	Homo sapiens	increases^expression
Amiodarone	CDC25A	Homo sapiens	increases^expression
Arsenic Trioxide	CDC25A	Homo sapiens	increases^expression
Arsenic Trioxide	CDC25A	Homo sapiens	increases^expression
Benzo(a)pyrene	CDC25A	Homo sapiens	increases^expression
butylparaben	CDC25A	Homo sapiens	increases^expression
chromium hexavalent ion	CDC25A	Homo sapiens	increases^expression
Cisplatin	CDC25A	Homo sapiens	increases^expression
Citrinin	CDC25A	Homo sapiens	increases^expression
Coumestrol	CDC25A	Homo sapiens	increases^expression
Daunorubicin	CDC25A	Homo sapiens	increases^expression
Estradiol	CDC25A	Homo sapiens	increases^expression
Estradiol	CDC25A	Homo sapiens	increases^expression
Harmine	CDC25A	Homo sapiens	increases^expression
(+)-JQ1 compound	CDC25A	Homo sapiens	increases^expression
lasiocarpine	CDC25A	Homo sapiens	increases^expression
Methyl Methanesulfonate	CDC25A	Homo sapiens	increases^expression
methylparaben	CDC25A	Homo sapiens	increases^expression
N-(2,3-dichloro-4-hydroxyphenyl)-1-methylcyclohexanecarboxamide	CDC25A	Homo sapiens	increases^expression
Nickel	CDC25A	Homo sapiens	increases^expression
ON123300	CDC25A	Homo sapiens	increases^expression
Plant Extracts	CDC25A	Homo sapiens	increases^expression
potassium chromate(VI)	CDC25A	Homo sapiens	increases^expression
propylparaben	CDC25A	Homo sapiens	increases^expression
protopanaxadiol	CDC25A	Homo sapiens	increases^expression
Silicon Dioxide	CDC25A	Homo sapiens	increases^expression
Silicon Dioxide	CDC25A	Homo sapiens	increases^expression
sodium arsenite	CDC25A	Homo sapiens	increases^expression
Sodium Dodecyl Sulfate	CDC25A	Homo sapiens	increases^expression
Tetrachlorodibenzodioxin	CDC25A	Homo sapiens	increases^expression
Tobacco Smoke Pollution	CDC25A	Homo sapiens	increases^expression
tylophorine	CDC25A	Homo sapiens	increases^expression
Zinc	CDC25A	Homo sapiens	increases^expression
Arsenic Trioxide	FYCO1	Homo sapiens	increases^expression
bisphenol A	FYCO1	Homo sapiens	increases^expression
Copper Sulfate	FYCO1	Homo sapiens	increases^expression
Dexamethasone	FYCO1	Homo sapiens	increases^expression
dicrotophos	FYCO1	Homo sapiens	increases^expression
Estradiol	FYCO1	Homo sapiens	increases^expression
Rotenone	FYCO1	Homo sapiens	increases^expression
Sunitinib	FYCO1	Homo sapiens	increases^expression
Valproic Acid	FYCO1	Homo sapiens	increases^expression
abrine	RFTN1	Homo sapiens	increases^expression
Demecolcine	RFTN1	Homo sapiens	increases^expression
Estradiol	RFTN1	Homo sapiens	increases^expression
Formaldehyde	RFTN1	Homo sapiens	increases^expression
Hydrogen Peroxide	RFTN1	Homo sapiens	increases^expression
hydroquinone	RFTN1	Homo sapiens	increases^expression
Methotrexate	RFTN1	Homo sapiens	increases^expression
methylmercuric chloride	RFTN1	Homo sapiens	increases^expression
Resveratrol	RFTN1	Homo sapiens	increases^expression
Selenium	RFTN1	Homo sapiens	increases^expression
Sunitinib	RFTN1	Homo sapiens	increases^expression
Tetrachlorodibenzodioxin	RFTN1	Homo sapiens	increases^expression
Tretinoin	RFTN1	Homo sapiens	increases^expression
trichostatin A	RFTN1	Homo sapiens	increases^expression
Valproic Acid	RFTN1	Homo sapiens	increases^expression
Vincristine	RFTN1	Homo sapiens	increases^expression
Vitamin E	RFTN1	Homo sapiens	increases^expression
Arsenic	CDC25A	Homo sapiens	increases^expression
sodium arsenate	CDC25A	Homo sapiens	increases^expression
Arsenic	RFTN1	Homo sapiens	increases^expression
sodium arsenate	RFTN1	Homo sapiens	increases^expression
Estradiol	CDC25A	Homo sapiens	increases^expression
Estradiol	CDC25A	Homo sapiens	increases^expression
sodium arsenite	CDC25A	Homo sapiens	increases^expression
Tamoxifen	CDC25A	Homo sapiens	increases^expression
Estradiol	CDC25A	Homo sapiens	increases^expression
Estradiol	CDC25A	Homo sapiens	increases^expression
protopanaxadiol	CDC25A	Homo sapiens	increases^expression
2-(1H-indazol-4-yl)-6-(4-methanesulfonylpiperazin-1-ylmethyl)-4-morpholin-4-ylthieno(3,2-d)pyrimidine	CDC25A	Homo sapiens	decreases^expression
pifithrin	CDC25A	Homo sapiens	decreases^expression
sodium arsenite	CDC25A	Homo sapiens	decreases^expression
sodium arsenite	CDC25A	Homo sapiens	decreases^expression
1,25-dihydroxyvitamin D	CDC25A	Homo sapiens	decreases^expression
16-hydroxycleroda-3,13(14)-dien-15,16-olide	CDC25A	Homo sapiens	decreases^expression
2-(2-hydroxyethylsulfanyl)-3-methyl-1,4-naphthoquinone	CDC25A	Homo sapiens	decreases^expression
2,3,5-trichloro-6-phenyl-(1,4)benzoquinone	CDC25A	Homo sapiens	decreases^expression
3,4-dihydroxyphenylethanol	CDC25A	Homo sapiens	decreases^expression
4-hydroxy-2-nonenal	CDC25A	Homo sapiens	decreases^expression
7,8-Dihydro-7,8-dihydroxybenzo(a)pyrene 9,10-oxide	CDC25A	Homo sapiens	decreases^expression
7-(benzylamino)-1,3,4,8-tetrahydropyrrolo(4,3,2-de)quinolin-8(1H)-one	CDC25A	Homo sapiens	decreases^expression
A 771726	CDC25A	Homo sapiens	decreases^expression
Adenine	CDC25A	Homo sapiens	decreases^expression
afuresertib	CDC25A	Homo sapiens	decreases^expression
Aspirin	CDC25A	Homo sapiens	decreases^expression
Atrazine	CDC25A	Homo sapiens	decreases^expression
Azathioprine	CDC25A	Homo sapiens	decreases^expression
bazedoxifene	CDC25A	Homo sapiens	decreases^expression
bis-N,N-dimethylamino-2-(N-methylpyrrolyl)methyl cyclopentadienyl titanium (IV)	CDC25A	Homo sapiens	decreases^expression
bisphenol A	CDC25A	Homo sapiens	decreases^expression
C646 compound	CDC25A	Homo sapiens	decreases^expression
Calcitriol	CDC25A	Homo sapiens	decreases^expression
Chlorodiphenyl (54% Chlorine)	CDC25A	Homo sapiens	decreases^expression
Cisplatin	CDC25A	Homo sapiens	decreases^expression
Citrinin	CDC25A	Homo sapiens	decreases^expression
Colchicine	CDC25A	Homo sapiens	decreases^expression
Copper Sulfate	CDC25A	Homo sapiens	decreases^expression
Cyclosporine	CDC25A	Homo sapiens	decreases^expression
Dasatinib	CDC25A	Homo sapiens	decreases^expression
entinostat	CDC25A	Homo sapiens	decreases^expression
erucylphospho-N,N,N-trimethylpropylammonium	CDC25A	Homo sapiens	decreases^expression
Ethanol	CDC25A	Homo sapiens	decreases^expression
Etoposide	CDC25A	Homo sapiens	decreases^expression
Fluorouracil	CDC25A	Homo sapiens	decreases^expression
gamabufotalin	CDC25A	Homo sapiens	decreases^expression
geraniol	CDC25A	Homo sapiens	decreases^expression
glyphosate	CDC25A	Homo sapiens	decreases^expression
GSK-J4	CDC25A	Homo sapiens	decreases^expression
GW 3965	CDC25A	Homo sapiens	decreases^expression
Heterocyclic Compounds, 3-Ring	CDC25A	Homo sapiens	decreases^expression
Hydrogen Peroxide	CDC25A	Homo sapiens	decreases^expression
ICG 001	CDC25A	Homo sapiens	decreases^expression
(+)-JQ1 compound	CDC25A	Homo sapiens	decreases^expression
leptomycin B	CDC25A	Homo sapiens	decreases^expression
licochalcone B	CDC25A	Homo sapiens	decreases^expression
methylselenic acid	CDC25A	Homo sapiens	decreases^expression
methylselenic acid	CDC25A	Homo sapiens	decreases^expression
Mustard Gas	CDC25A	Homo sapiens	decreases^expression
Nanotubes, Carbon	CDC25A	Homo sapiens	decreases^expression
ochratoxin A	CDC25A	Homo sapiens	decreases^expression
Oxygen	CDC25A	Homo sapiens	decreases^expression
palbociclib	CDC25A	Homo sapiens	decreases^expression
Piroxicam	CDC25A	Homo sapiens	decreases^expression
riccardin D	CDC25A	Homo sapiens	decreases^expression
Rotenone	CDC25A	Homo sapiens	decreases^expression
sodium arsenite	CDC25A	Homo sapiens	decreases^expression
sodium arsenite	CDC25A	Homo sapiens	decreases^expression
Sunitinib	CDC25A	Homo sapiens	decreases^expression
tamibarotene	CDC25A	Homo sapiens	decreases^expression
taxifolin	CDC25A	Homo sapiens	decreases^expression
Tetrachlorodibenzodioxin	CDC25A	Homo sapiens	decreases^expression
tris(1,3-dichloro-2-propyl)phosphate	CDC25A	Homo sapiens	decreases^expression
Troglitazone	CDC25A	Homo sapiens	decreases^expression
Valproic Acid	CDC25A	Homo sapiens	decreases^expression
abrine	FYCO1	Homo sapiens	decreases^expression
Acetaminophen	FYCO1	Homo sapiens	decreases^expression
Coumestrol	FYCO1	Homo sapiens	decreases^expression
Lactic Acid	FYCO1	Homo sapiens	decreases^expression
methylmercuric chloride	FYCO1	Homo sapiens	decreases^expression
tert-Butylhydroperoxide	FYCO1	Homo sapiens	decreases^expression
Urethane	FYCO1	Homo sapiens	decreases^expression
Acetaminophen	RFTN1	Homo sapiens	decreases^expression
Aflatoxin B1	RFTN1	Homo sapiens	decreases^expression
Cisplatin	RFTN1	Homo sapiens	decreases^expression
cobaltous chloride	RFTN1	Homo sapiens	decreases^expression
Coumestrol	RFTN1	Homo sapiens	decreases^expression
Cyclosporine	RFTN1	Homo sapiens	decreases^expression
(+)-JQ1 compound	RFTN1	Homo sapiens	decreases^expression
methyleugenol	RFTN1	Homo sapiens	decreases^expression
Particulate Matter	RFTN1	Homo sapiens	decreases^expression
perfluorononanoic acid	RFTN1	Homo sapiens	decreases^expression
Tetrachlorodibenzodioxin	RFTN1	Homo sapiens	decreases^expression
Thapsigargin	RFTN1	Homo sapiens	decreases^expression
Tobacco Smoke Pollution	RFTN1	Homo sapiens	decreases^expression
tobacco tar	RFTN1	Homo sapiens	decreases^expression
Tretinoin	RFTN1	Homo sapiens	decreases^expression
trichostatin A	RFTN1	Homo sapiens	decreases^expression
tris(1,3-dichloro-2-propyl)phosphate	RFTN1	Homo sapiens	decreases^expression
Urethane	RFTN1	Homo sapiens	decreases^expression
Valproic Acid	RFTN1	Homo sapiens	decreases^expression
2,3-bis(3'-hydroxybenzyl)butyrolactone	CDC25A	Homo sapiens	increases^expression
Coumestrol	CDC25A	Homo sapiens	increases^expression
Coumestrol	CDC25A	Homo sapiens	increases^expression
epigallocatechin gallate	CDC25A	Homo sapiens	increases^expression
potassium chromate(VI)	CDC25A	Homo sapiens	increases^expression
Resveratrol	CDC25A	Homo sapiens	increases^expression
Zidovudine	CDC25A	Homo sapiens	increases^expression
Cisplatin	FYCO1	Homo sapiens	increases^expression
jinfukang	FYCO1	Homo sapiens	increases^expression
4-(5-benzo(1,3)dioxol-5-yl-4-pyridin-2-yl-1H-imidazol-2-yl)benzamide	RFTN1	Homo sapiens	increases^expression
4-(5-benzo(1,3)dioxol-5-yl-4-pyridin-2-yl-1H-imidazol-2-yl)benzamide	RFTN1	Homo sapiens	increases^expression
dorsomorphin	RFTN1	Homo sapiens	increases^expression
dorsomorphin	RFTN1	Homo sapiens	increases^expression
Estradiol	RFTN1	Homo sapiens	increases^expression
Estradiol	RFTN1	Homo sapiens	increases^expression
Phenylmercuric Acetate	RFTN1	Homo sapiens	increases^expression
Tetrachlorodibenzodioxin	RFTN1	Homo sapiens	increases^expression
Valproic Acid	RFTN1	Homo sapiens	increases^expression
Acrolein	FYCO1	Homo sapiens	decreases^expression
Air Pollutants	FYCO1	Homo sapiens	decreases^expression
alpha-pinene	FYCO1	Homo sapiens	decreases^expression
methacrylaldehyde	FYCO1	Homo sapiens	decreases^expression
Ozone	FYCO1	Homo sapiens	decreases^expression
1-Butanol	RFTN1	Homo sapiens	decreases^expression
Gasoline	RFTN1	Homo sapiens	decreases^expression
Particulate Matter	RFTN1	Homo sapiens	decreases^expression
Polycyclic Aromatic Hydrocarbons	RFTN1	Homo sapiens	decreases^expression
Cisplatin	CDC25A	Homo sapiens	decreases^expression
Citrinin	CDC25A	Homo sapiens	decreases^expression
Ethanol	CDC25A	Homo sapiens	decreases^expression
Folic Acid	CDC25A	Homo sapiens	decreases^expression
jinfukang	CDC25A	Homo sapiens	decreases^expression
(+)-JQ1 compound	CDC25A	Homo sapiens	decreases^expression
Metformin	CDC25A	Homo sapiens	decreases^expression
ochratoxin A	CDC25A	Homo sapiens	decreases^expression
Paclitaxel	CDC25A	Homo sapiens	decreases^expression
Vemurafenib	CDC25A	Homo sapiens	decreases^expression
2,3-bis(3'-hydroxybenzyl)butyrolactone	FYCO1	Homo sapiens	decreases^expression
Acrolein	FYCO1	Homo sapiens	decreases^expression
alpha-pinene	FYCO1	Homo sapiens	decreases^expression
Coumestrol	FYCO1	Homo sapiens	decreases^expression
methacrylaldehyde	FYCO1	Homo sapiens	decreases^expression
Ozone	FYCO1	Homo sapiens	decreases^expression
Ozone	FYCO1	Homo sapiens	decreases^expression
Volatile Organic Compounds	FYCO1	Homo sapiens	decreases^expression
2,3-bis(3'-hydroxybenzyl)butyrolactone	RFTN1	Homo sapiens	decreases^expression
Cisplatin	RFTN1	Homo sapiens	decreases^expression
Coumestrol	RFTN1	Homo sapiens	decreases^expression
Hydrogen Peroxide	RFTN1	Homo sapiens	decreases^expression
jinfukang	RFTN1	Homo sapiens	decreases^expression
Raloxifene Hydrochloride	RFTN1	Homo sapiens	decreases^expression
Tamoxifen	RFTN1	Homo sapiens	decreases^expression
Theophylline	RFTN1	Homo sapiens	decreases^expression
Chelating Agents	CDC25A	Homo sapiens	increases^expression
Copper	CDC25A	Homo sapiens	increases^expression
Copper	RFTN1	Homo sapiens	increases^expression
Disulfiram	RFTN1	Homo sapiens	increases^expression
Copper	CDC25A	Homo sapiens	decreases^expression
NSC 689534	CDC25A	Homo sapiens	decreases^expression

## Sheet: all 104 drugs for CDC25A
2,2',4,4'-tetrabromodiphenyl ether
5-OH-BDE-47
Acetaminophen
Aflatoxin B1
Amiodarone
Arsenic Trioxide
Benzo(a)pyrene
butylparaben
chromium hexavalent ion
Cisplatin
Citrinin
Coumestrol
Daunorubicin
Estradiol
Harmine
(+)-JQ1 compound
lasiocarpine
Methyl Methanesulfonate
methylparaben
N-(2,3-dichloro-4-hydroxyphenyl)-1-methylcyclohexanecarboxamide
Nickel
ON123300
Plant Extracts
potassium chromate(VI)
propylparaben
protopanaxadiol
Silicon Dioxide
sodium arsenite
Sodium Dodecyl Sulfate
Tetrachlorodibenzodioxin
Tobacco Smoke Pollution
tylophorine
Zinc
Arsenic
sodium arsenate
Tamoxifen
2-(1H-indazol-4-yl)-6-(4-methanesulfonylpiperazin-1-ylmethyl)-4-morpholin-4-ylthieno(3,2-d)pyrimidine
pifithrin
1,25-dihydroxyvitamin D
16-hydroxycleroda-3,13(14)-dien-15,16-olide
2-(2-hydroxyethylsulfanyl)-3-methyl-1,4-naphthoquinone
2,3,5-trichloro-6-phenyl-(1,4)benzoquinone
3,4-dihydroxyphenylethanol
4-hydroxy-2-nonenal
7,8-Dihydro-7,8-dihydroxybenzo(a)pyrene 9,10-oxide
7-(benzylamino)-1,3,4,8-tetrahydropyrrolo(4,3,2-de)quinolin-8(1H)-one
A 771726
Adenine
afuresertib
Aspirin
Atrazine
Azathioprine
bazedoxifene
bis-N,N-dimethylamino-2-(N-methylpyrrolyl)methyl cyclopentadienyl titanium (IV)
bisphenol A
C646 compound
Calcitriol
Chlorodiphenyl (54% Chlorine)
Colchicine
Copper Sulfate
Cyclosporine
Dasatinib
entinostat
erucylphospho-N,N,N-trimethylpropylammonium
Ethanol
Etoposide
Fluorouracil
gamabufotalin
geraniol
glyphosate
GSK-J4
GW 3965
Heterocyclic Compounds, 3-Ring
Hydrogen Peroxide
ICG 001
leptomycin B
licochalcone B
methylselenic acid
Mustard Gas
Nanotubes, Carbon
ochratoxin A
Oxygen
palbociclib
Piroxicam
riccardin D
Rotenone
Sunitinib
tamibarotene
taxifolin
tris(1,3-dichloro-2-propyl)phosphate
Troglitazone
Valproic Acid
2,3-bis(3'-hydroxybenzyl)butyrolactone
epigallocatechin gallate
Resveratrol
Zidovudine
Folic Acid
jinfukang
Metformin
Paclitaxel
Vemurafenib
Chelating Agents
Copper
NSC 689534

## Sheet: up-dn drugs for CDC25A
UP	DN
2,2',4,4'-tetrabromodiphenyl ether	2-(1H-indazol-4-yl)-6-(4-methanesulfonylpiperazin-1-ylmethyl)-4-morpholin-4-ylthieno(3,2-d)pyrimidine
5-OH-BDE-47	pifithrin
Acetaminophen	sodium arsenite
Aflatoxin B1	1,25-dihydroxyvitamin D
Amiodarone	16-hydroxycleroda-3,13(14)-dien-15,16-olide
Arsenic Trioxide	2-(2-hydroxyethylsulfanyl)-3-methyl-1,4-naphthoquinone
Benzo(a)pyrene	2,3,5-trichloro-6-phenyl-(1,4)benzoquinone
butylparaben	3,4-dihydroxyphenylethanol
chromium hexavalent ion	4-hydroxy-2-nonenal
Cisplatin	7,8-Dihydro-7,8-dihydroxybenzo(a)pyrene 9,10-oxide
Citrinin	7-(benzylamino)-1,3,4,8-tetrahydropyrrolo(4,3,2-de)quinolin-8(1H)-one
Coumestrol	A 771726
Daunorubicin	Adenine
Estradiol	afuresertib
Harmine	Aspirin
(+)-JQ1 compound	Atrazine
lasiocarpine	Azathioprine
Methyl Methanesulfonate	bazedoxifene
methylparaben	bis-N,N-dimethylamino-2-(N-methylpyrrolyl)methyl cyclopentadienyl titanium (IV)
N-(2,3-dichloro-4-hydroxyphenyl)-1-methylcyclohexanecarboxamide	bisphenol A
Nickel	C646 compound
ON123300	Calcitriol
Plant Extracts	Chlorodiphenyl (54% Chlorine)
potassium chromate(VI)	Cisplatin
propylparaben	Citrinin
protopanaxadiol	Colchicine
Silicon Dioxide	Copper Sulfate
sodium arsenite	Cyclosporine
Sodium Dodecyl Sulfate	Dasatinib
Tetrachlorodibenzodioxin	entinostat
Tobacco Smoke Pollution	erucylphospho-N,N,N-trimethylpropylammonium
tylophorine	Ethanol
Zinc	Etoposide
Arsenic	Fluorouracil
sodium arsenate	gamabufotalin
Tamoxifen	geraniol
2,3-bis(3'-hydroxybenzyl)butyrolactone	glyphosate
epigallocatechin gallate	GSK-J4
Resveratrol	GW 3965
Zidovudine	Heterocyclic Compounds, 3-Ring
Chelating Agents	Hydrogen Peroxide
Copper	ICG 001
	(+)-JQ1 compound
	leptomycin B
	licochalcone B
	methylselenic acid
	Mustard Gas
	Nanotubes, Carbon
	ochratoxin A
	Oxygen
	palbociclib
	Piroxicam
	riccardin D
	Rotenone
	Sunitinib
	tamibarotene
	taxifolin
	Tetrachlorodibenzodioxin
	tris(1,3-dichloro-2-propyl)phosphate
	Troglitazone
	Valproic Acid
	Folic Acid
	jinfukang
	Metformin
	Paclitaxel
	Vemurafenib
	Copper
	NSC 689534

## Sheet: all 25 drugs for FYCO1
Arsenic Trioxide
bisphenol A
Copper Sulfate
Dexamethasone
dicrotophos
Estradiol
Rotenone
Sunitinib
Valproic Acid
abrine
Acetaminophen
Coumestrol
Lactic Acid
methylmercuric chloride
tert-Butylhydroperoxide
Urethane
Cisplatin
jinfukang
Acrolein
Air Pollutants
alpha-pinene
methacrylaldehyde
Ozone
2,3-bis(3'-hydroxybenzyl)butyrolactone
Volatile Organic Compounds

## Sheet: up-dn drugs for FYCO1
UP	DN
Arsenic Trioxide	abrine
bisphenol A	Acetaminophen
Copper Sulfate	Coumestrol
Dexamethasone	Lactic Acid
dicrotophos	methylmercuric chloride
Estradiol	tert-Butylhydroperoxide
Rotenone	Urethane
Sunitinib	Acrolein
Valproic Acid	Air Pollutants
Cisplatin	alpha-pinene
jinfukang	methacrylaldehyde
	Ozone
	2,3-bis(3'-hydroxybenzyl)butyrolactone
	Volatile Organic Compounds

## Sheet: all 47 drugs for RFTN1
abrine
Demecolcine
Estradiol
Formaldehyde
Hydrogen Peroxide
hydroquinone
Methotrexate
methylmercuric chloride
Resveratrol
Selenium
Sunitinib
Tetrachlorodibenzodioxin
Tretinoin
trichostatin A
Valproic Acid
Vincristine
Vitamin E
Arsenic
sodium arsenate
Acetaminophen
Aflatoxin B1
Cisplatin
cobaltous chloride
Coumestrol
Cyclosporine
(+)-JQ1 compound
methyleugenol
Particulate Matter
perfluorononanoic acid
Thapsigargin
Tobacco Smoke Pollution
tobacco tar
tris(1,3-dichloro-2-propyl)phosphate
Urethane
4-(5-benzo(1,3)dioxol-5-yl-4-pyridin-2-yl-1H-imidazol-2-yl)benzamide
dorsomorphin
Phenylmercuric Acetate
1-Butanol
Gasoline
Polycyclic Aromatic Hydrocarbons
2,3-bis(3'-hydroxybenzyl)butyrolactone
jinfukang
Raloxifene Hydrochloride
Tamoxifen
Theophylline
Copper
Disulfiram

## Sheet: up-dn drugs for RFTN1
UP	DN
abrine	Acetaminophen
Demecolcine	Aflatoxin B1
Estradiol	Cisplatin
Formaldehyde	cobaltous chloride
Hydrogen Peroxide	Coumestrol
hydroquinone	Cyclosporine
Methotrexate	(+)-JQ1 compound
methylmercuric chloride	methyleugenol
Resveratrol	Particulate Matter
Selenium	perfluorononanoic acid
Sunitinib	Tetrachlorodibenzodioxin
Tetrachlorodibenzodioxin	Thapsigargin
Tretinoin	Tobacco Smoke Pollution
trichostatin A	tobacco tar
Valproic Acid	Tretinoin
Vincristine	trichostatin A
Vitamin E	tris(1,3-dichloro-2-propyl)phosphate
Arsenic	Urethane
sodium arsenate	Valproic Acid
4-(5-benzo(1,3)dioxol-5-yl-4-pyridin-2-yl-1H-imidazol-2-yl)benzamide	1-Butanol
dorsomorphin	Gasoline
Phenylmercuric Acetate	Polycyclic Aromatic Hydrocarbons
Copper	2,3-bis(3'-hydroxybenzyl)butyrolactone
Disulfiram	Hydrogen Peroxide
	jinfukang
	Raloxifene Hydrochloride
	Tamoxifen
	Theophylline
